# Supplementary material for: Exogenous Methyl Jasmonate Improves Cold Tolerance with Parallel Induction of Two Cold-Regulated (COR) Genes Expression in Triticum aestivum L.
Source: MDPI journal article supplement (doi:10.3390/plants10071421), 2021-07-12
Supplement: s1 [file s1]

**Table S1.** Sequences of primers for real-time PCR analysis.

| Gene                                | Forward and reverse primers | Nucleotide sequence of the primer<br>5'....3' | NCBI database<br>accession number |
|-------------------------------------|-----------------------------|-----------------------------------------------|-----------------------------------|
| <i>MnSOD</i>                        | forward                     | ACATAACTGTAAGTCCACG                           | AY963808                          |
|                                     | reverse                     | TTGCTCATTTCCTCATCTT                           |                                   |
| <i>FeSOD</i>                        | forward                     | GGGTCTGGTTGGGTTTG                             | JX398977                          |
|                                     | reverse                     | TCGCCTGTCATCCTTGTAATC                         |                                   |
| <i>CAT</i>                          | forward                     | TGATACCCAAAGGCACCG                            | X94352                            |
|                                     | reverse                     | GCAGCCAGATAGAACACG                            |                                   |
| <i>WCS19</i>                        | forward                     | AGGCGACGGAGGAGGCGTGGGAC                       | L13437                            |
|                                     | reverse                     | TTTTCTTTATTGCGTTTGACATT                       |                                   |
| <i>WCOR15</i>                       | forward                     | GGGAGCAACCTCTTCCATAGTGT                       | KP266692                          |
|                                     | reverse                     | CCAACCATCACAACCCTTCACTA                       |                                   |
| <i>WCS120</i>                       | forward                     | CACGGCACTGGCGAGAAGAAAGG                       | M93342                            |
|                                     | reverse                     | TGATGTTCTCCATGACGCCCTTC                       |                                   |
| <i>P5CS</i>                         | forward                     | GGAGACAAGTCCCGTGTGTTAG                        | KT868850                          |
|                                     | reverse                     | GCAGCAACAGCCATTTACGGAC                        |                                   |
| <i>Actin</i><br>(housekeeping gene) | forward                     | GGGACCTCACGGATAATCTAATG                       | AB181991                          |
|                                     | reverse                     | AACCTCCACTGAGAACAACATTAC                      |                                   |
